# Supplementary material for: Targeting the BRD4/FOXO3a/CDK6 axis sensitizes AKT inhibition in luminal breast cancer
Source: PubMed Central journal article supplement (PMC6281582; doi:10.1038/s41467-018-07258-y), 2018-12-05
Supplement: 41467_2018_7258_MOESM1_ESM.pdf [file 41467_2018_7258_MOESM1_ESM.pdf]

## **Targeting the BRD4/FOXO3a/CDK6 axis Sensitizes AKT Inhibition in Luminal Breast Cancer**

Jingyi Liu<sup>1,2,3</sup>, Zhibing Duan<sup>1,2</sup>, Weijie Guo<sup>1,2</sup>, Lei Zeng<sup>4,5</sup>, Yadi Wu<sup>2,6</sup>, Yule Chen<sup>1,2</sup>, Fang Tai<sup>7</sup>, Yifan Wang<sup>1,2</sup>, Yiwei Lin<sup>1,2</sup>, Qiang Zhang<sup>4,5</sup>, Yanling He<sup>7</sup>, Jiong Deng<sup>8</sup>, Rachel L. Stewart<sup>2</sup>, Chi Wang<sup>2</sup>, Pengnian Charles Lin<sup>3</sup>, Saghi Ghaffari<sup>9</sup>, B. Mark Evers<sup>2,10</sup>, Suling Liu<sup>11\*</sup>, Ming-Ming Zhou<sup>4\*</sup>, Binhua P. Zhou<sup>1,2\*</sup>, Jian Shi<sup>1,2,7\*</sup>

### **Supplementary Information:**

Supplementary Figure 1

Supplementary Figure 2

Supplementary Figure 3

Supplementary Figure 4

Supplementary Figure 5

Supplementary Figure 6

Supplementary Table 1

Supplementary Table 2

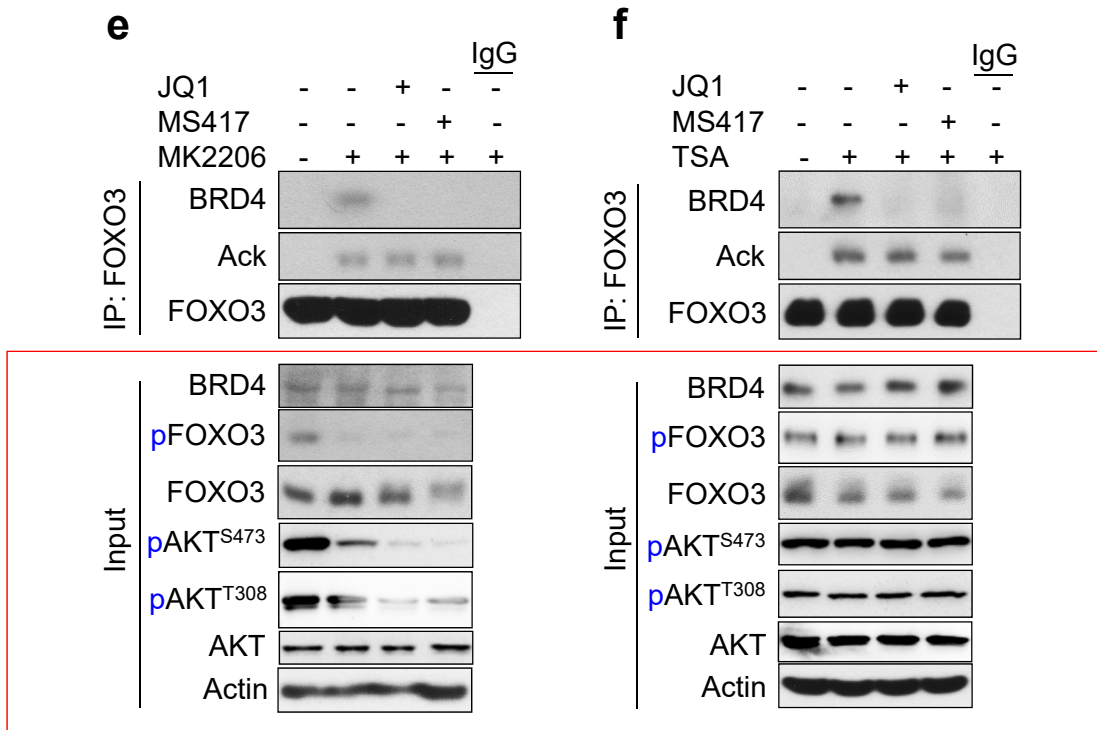

**Supplementary Figure 1**

Western blots showing expression of various molecules in input lysates of Figs 2e and 2f.

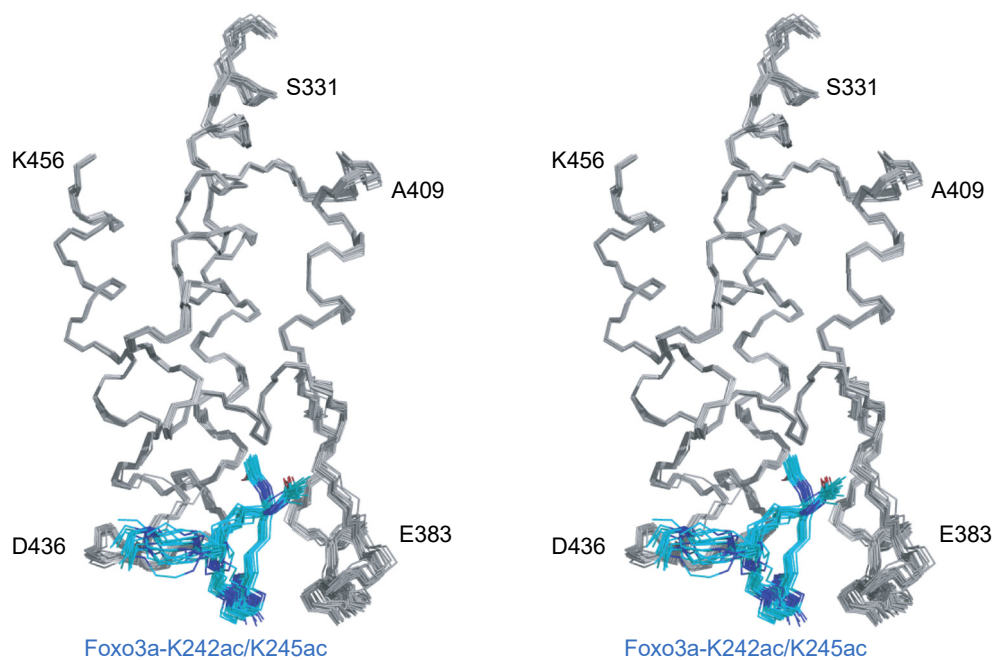

### Supplementary Figure 2

The 3D structure of the BRD4 BD2 in complex with a Foxo3a-K242ac/K245ac peptide (residues 352-455) is shown as stereo-view of the backbone atoms (N, C $\alpha$  and C') of 20 superimposed NMR structures of the complexes.

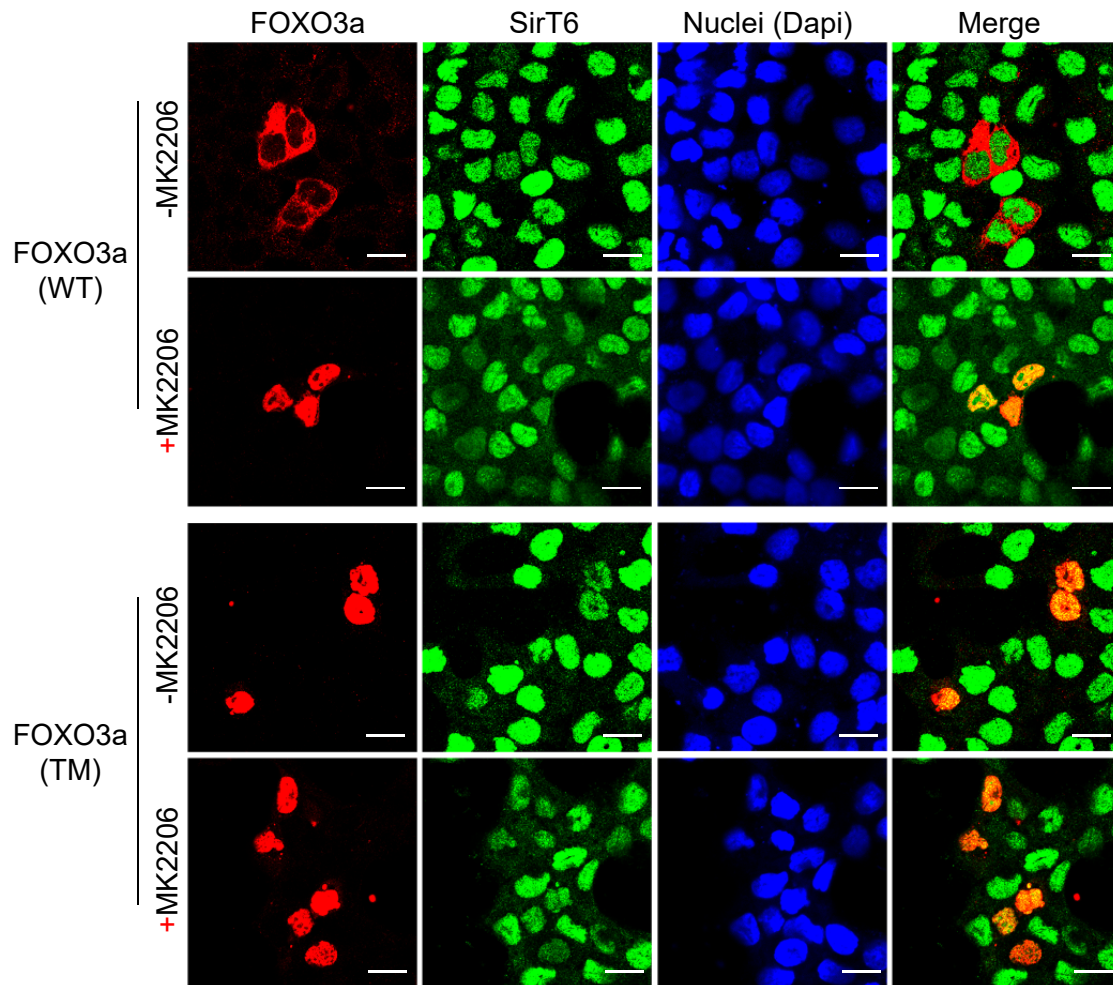

### Supplementary Figure 3

HA-tagged WT- or TM-FOXO3a was expressed in T47D cells treated with or without 1  $\mu$ M MK2206 for 6 h. The cellular localization of FOXO3a (red) and endogenous SirT6 (green) were analyzed by immunofluorescent staining. Nuclei stained with DAPI (blue). Scale bar, 20  $\mu$ M.

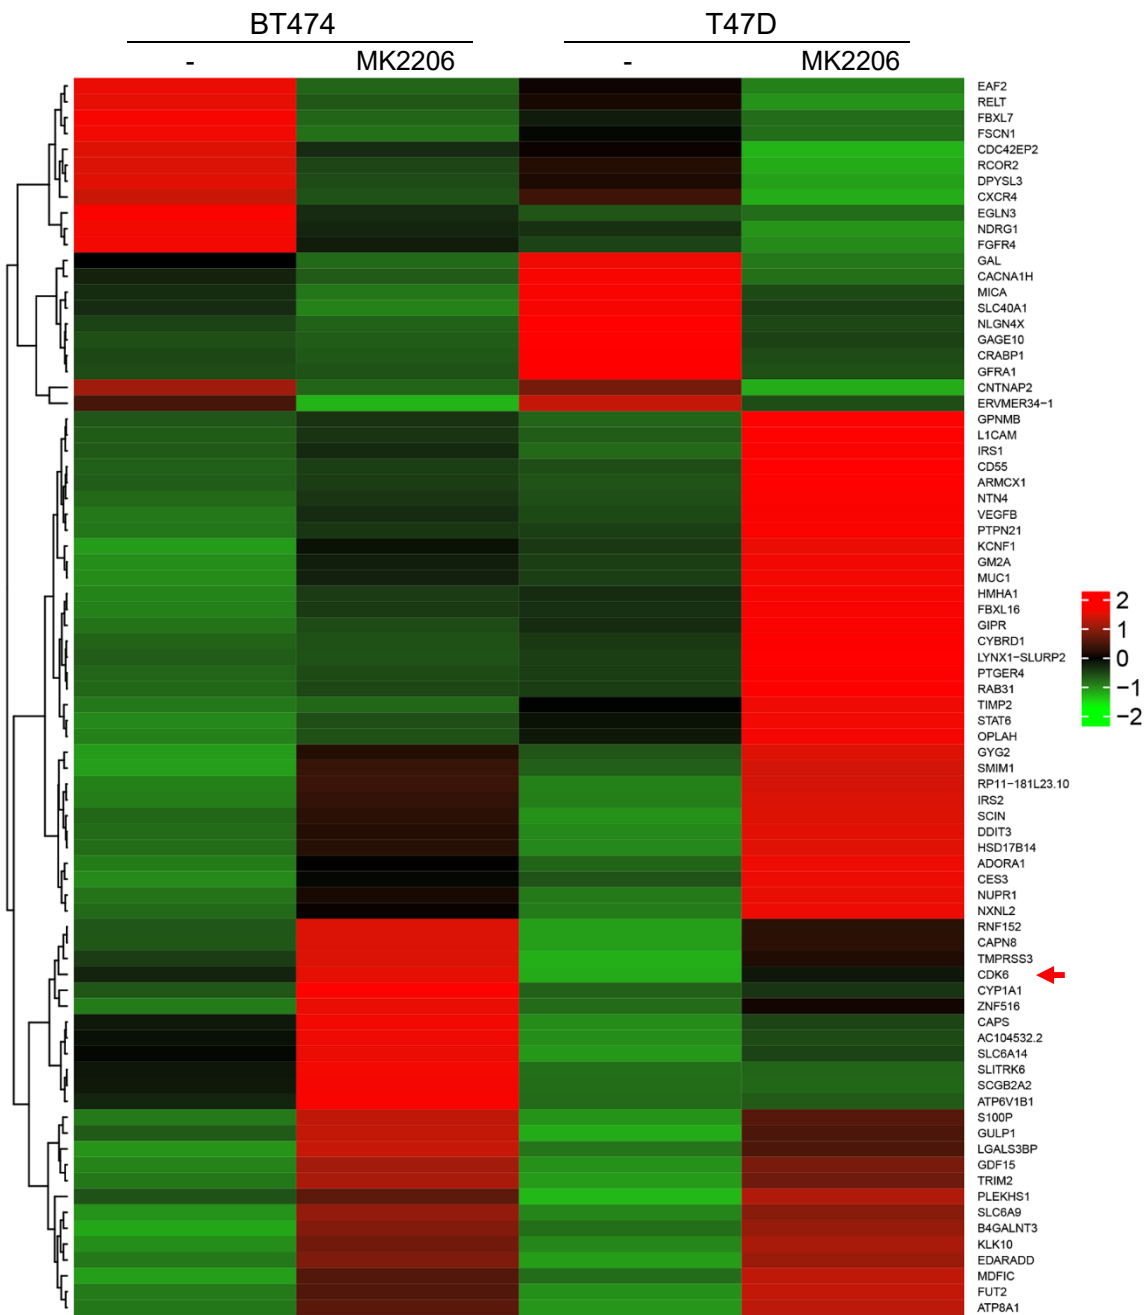

**Supplementary Figure 4**

Large heat-map showing the differentially expressed genes from Fig 5b.

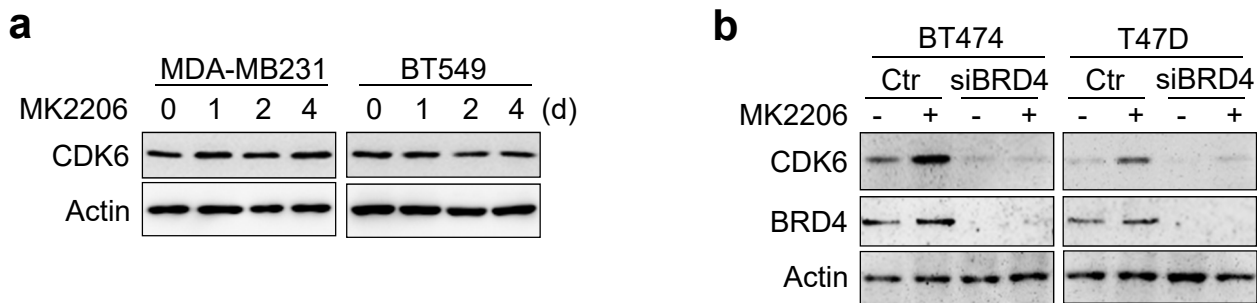

**Supplementary Figure 5**

- (a) MDA-MB231 and BT549 cells were treated with 1  $\mu$ M MK2206 for different time intervals, expression of CDK6 was analyzed by western blot.
- (b) Induction of CDK6 by MK2206 (1  $\mu$ M) was analyzed by western blot in BT474 and T47D cells with or without BRD4-knockdown.

**Supplementary Figure 6. Full scans of western blots images.**

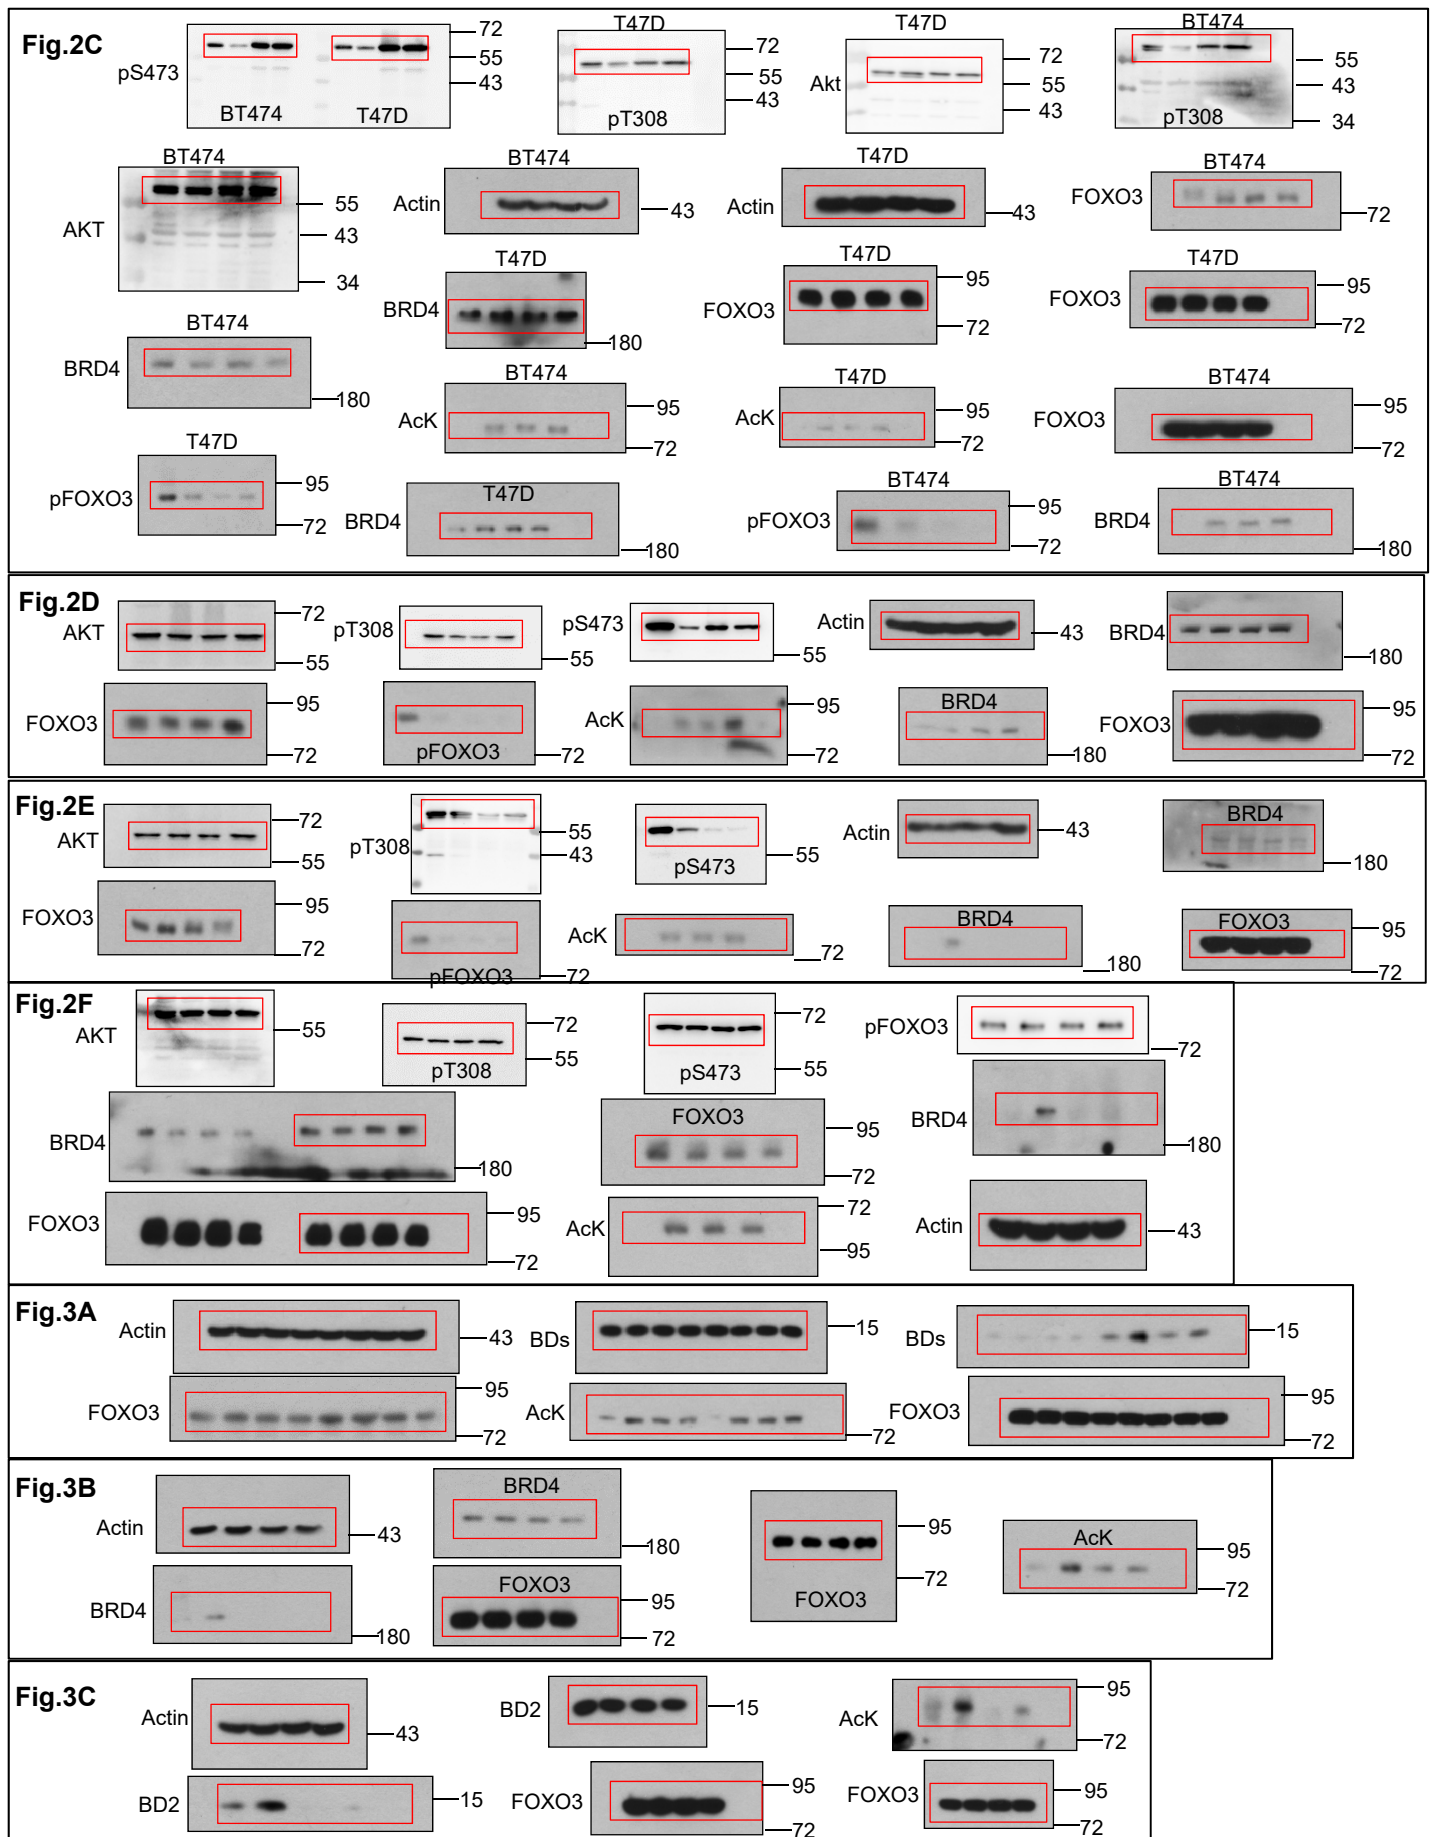

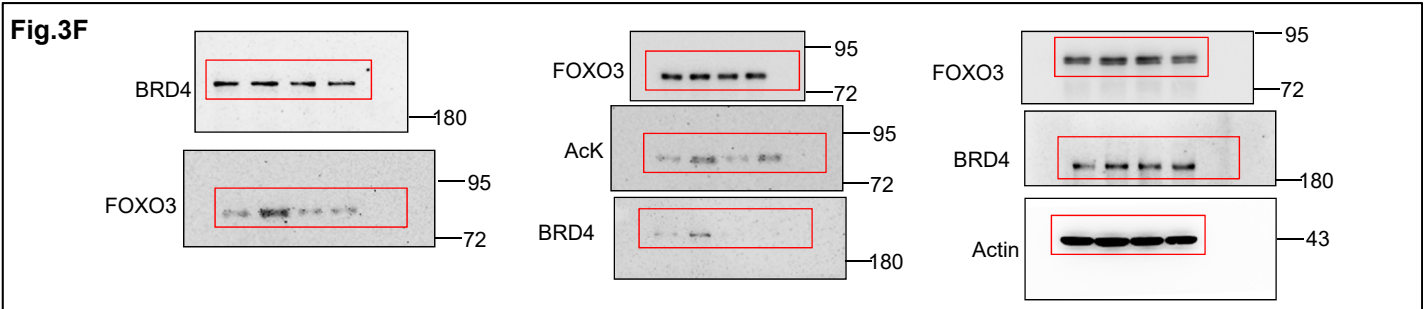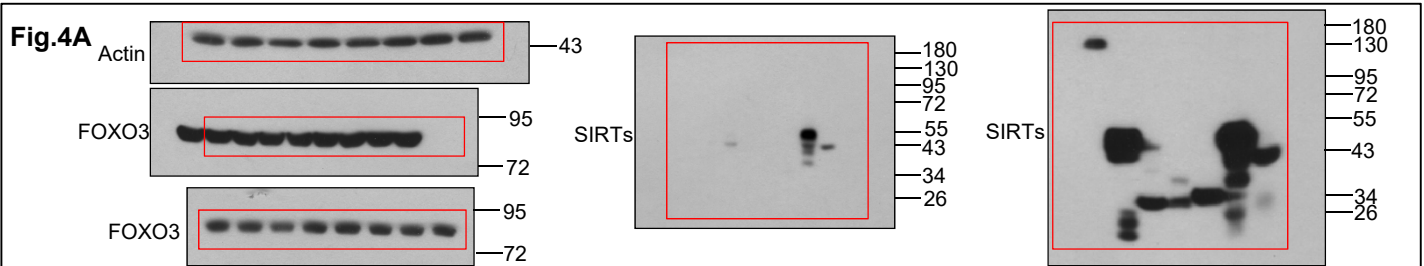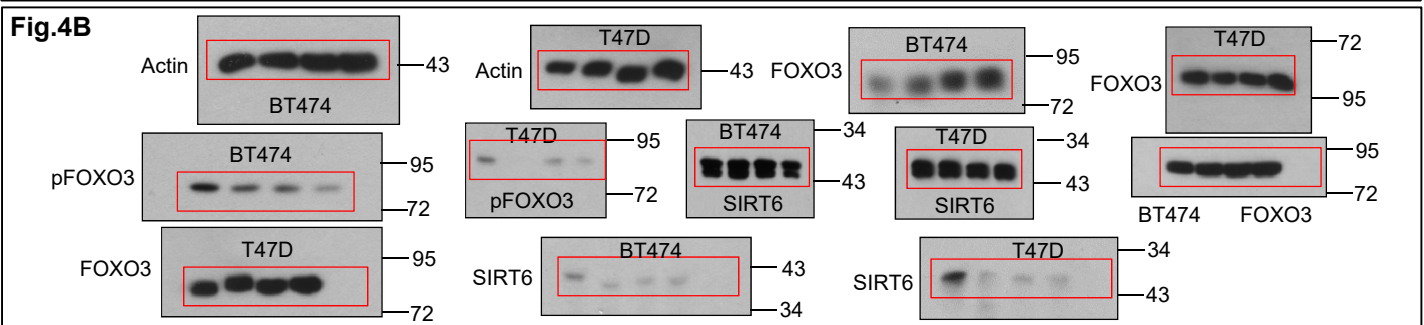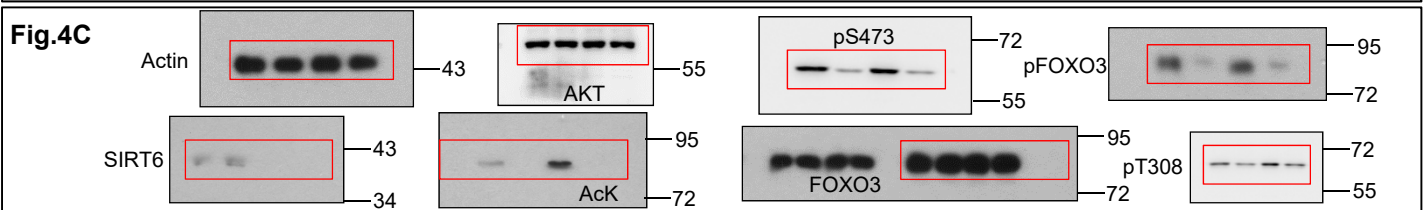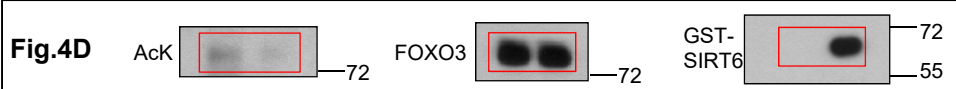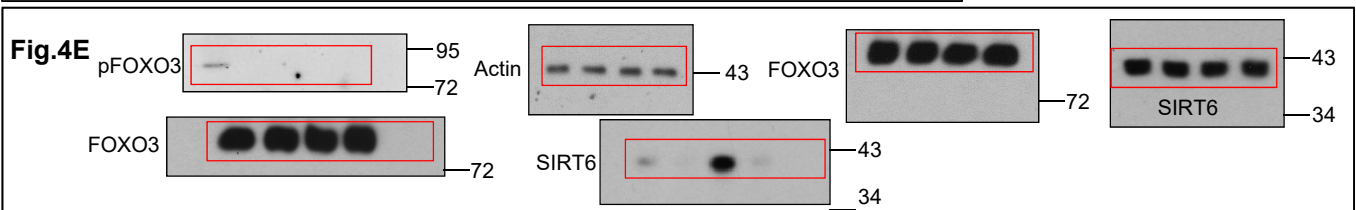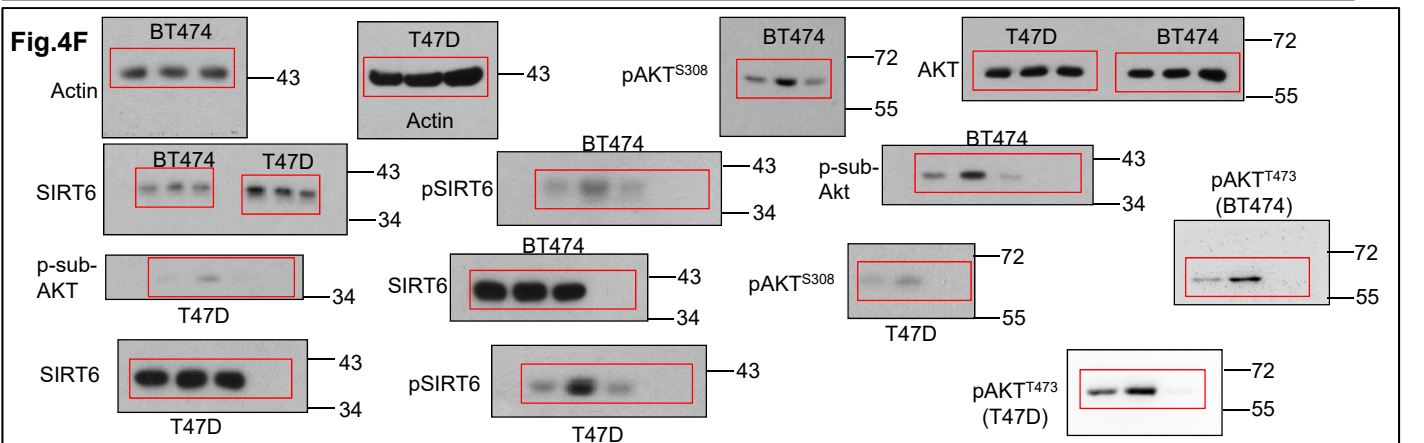



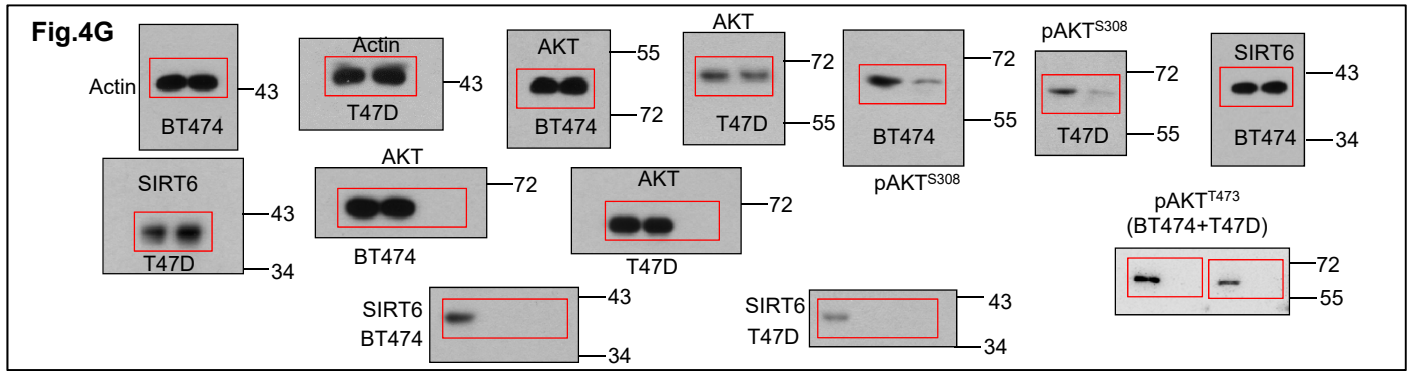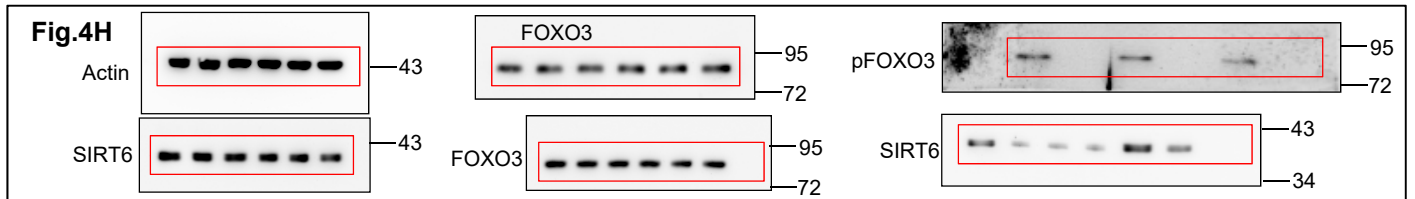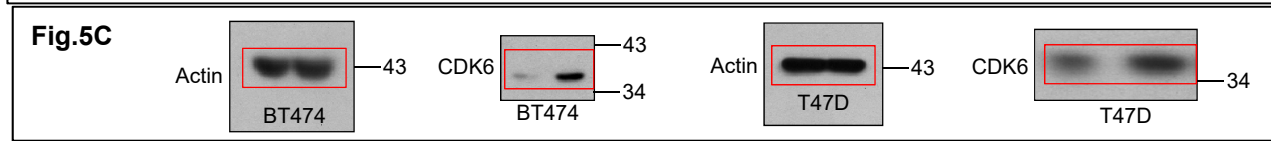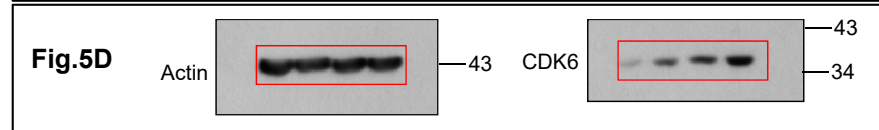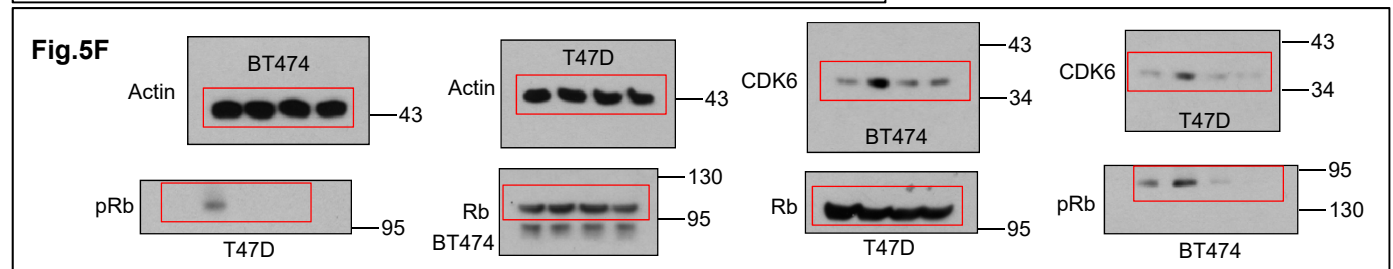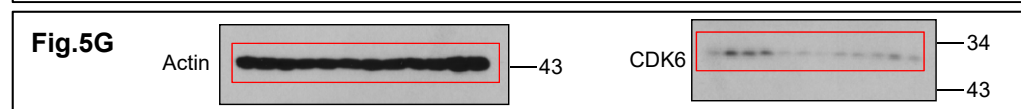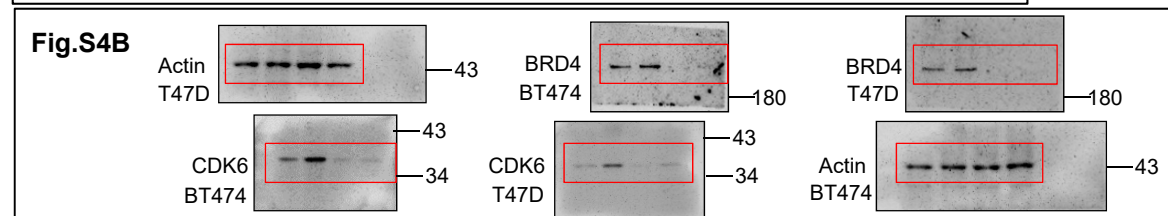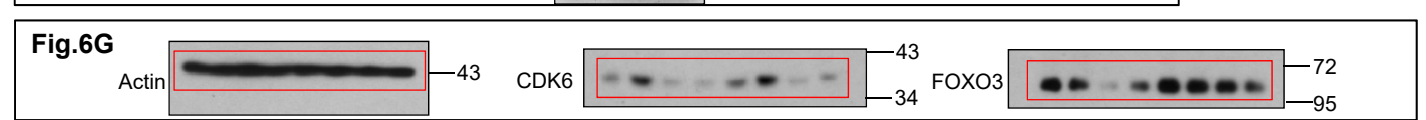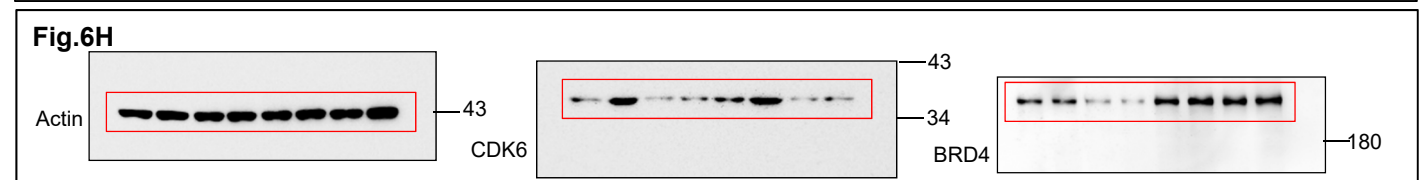

**Fig.7A**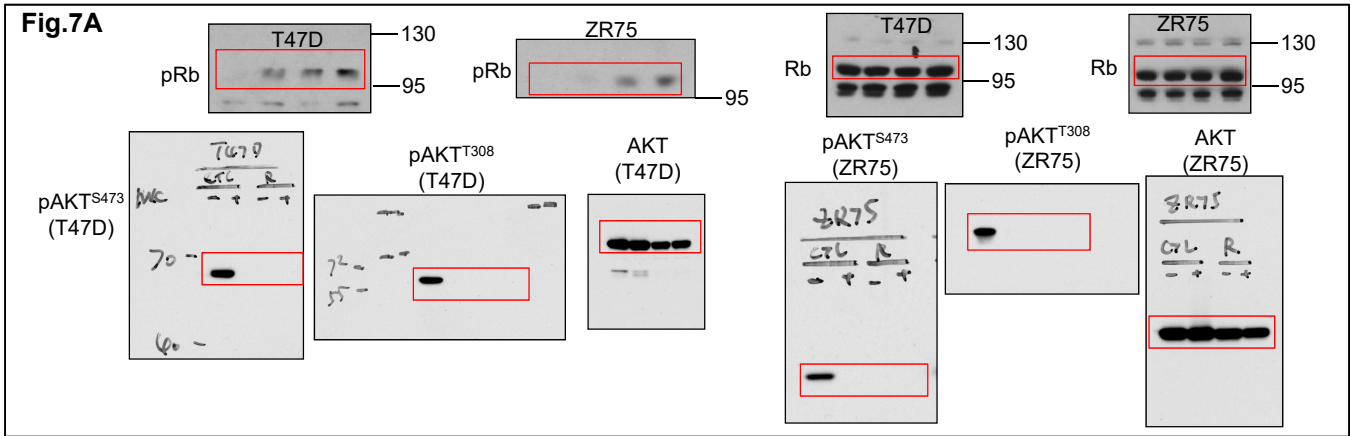**Fig.7B**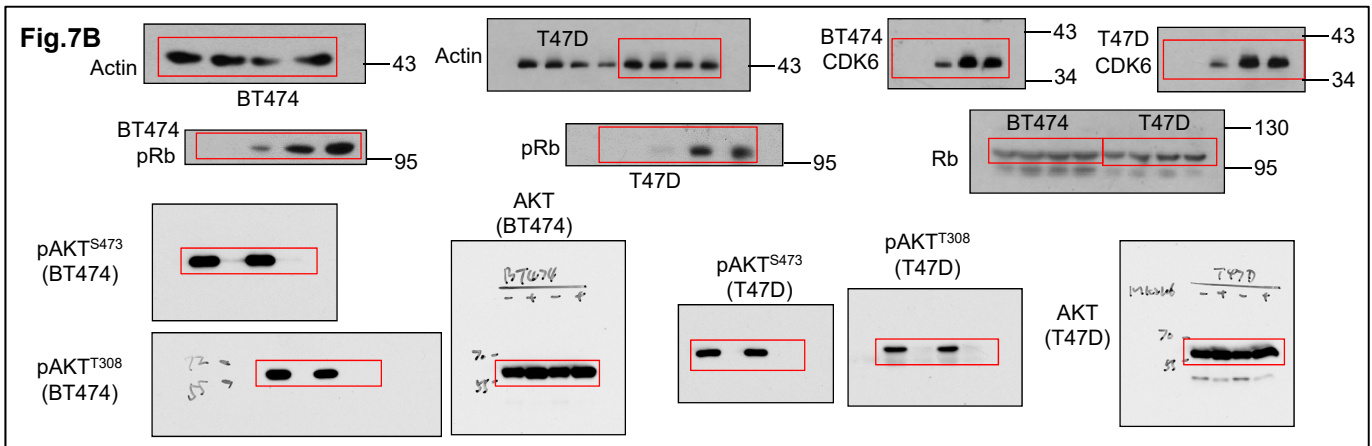**Fig.7C**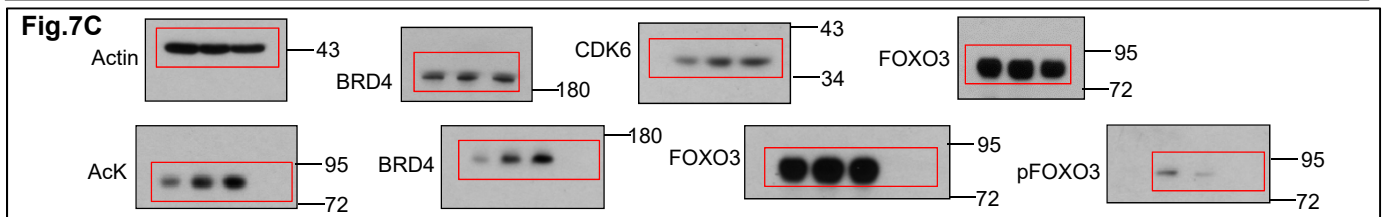

**Supplementary Table 1: Antibodies used in the study**

| <b>Antibody</b>    | <b>Vendors</b> | <b>Catalogue No</b> | <b>Applications</b> | <b>Dilution</b> |
|--------------------|----------------|---------------------|---------------------|-----------------|
| Akt                | CST            | 2938                | WB                  | 1:1000          |
| pAkt (T308)        | CST            | 2965                | WB                  | 1:1000          |
| pAkt (S473)        | CST            | 4060                | WB                  | 1:1000          |
| CDK6               | CST            | 13331               | WB                  | 1:1000          |
| FOXO3              | CST            | 12829               | WB                  | 1:1000          |
| FOXO3              | CST            | 12829               | IP                  | 1:250           |
| FOXO3              | CST            | 12829               | IF                  | 1:100           |
| BRD4               | CST            | 13440               | WB                  | 1:1000          |
| BRD4               | CST            | 13440               | IP                  | 1:250           |
| SIRT6              | CST            | 12486               | WB                  | 1:1000          |
| Phospho-Akt<br>sub | CST            | 9614                | WB                  | 1:1000          |
| Acetyl-lysine      | CST            | 9441                | WB                  | 1:1000          |
| Rb                 | CST            | 9313                | WB                  | 1:1000          |
| pRb                | CST            | 8180                | WB                  | 1:1000          |
| HA                 | Roche          | 11867423001         | WB                  | 1:5000          |
| HA                 | Roche          | 11867423001         | IP                  | 1:500           |
| Flag               | Sigma          | F3165               | WB                  | 1:5000          |
| Flag               | Sigma          | F3165               | IP                  | 1:500           |
| Actin              | Sigma          | A5441               | WB                  | 1:10,000        |

**Supplementary Table 1. Summary of Statistics of NMR Structures of the BRD4-BD2/FOXO3a Peptide Complex**

| <b>BRD4-BD2/FOXO3a</b>                              |                      |
|-----------------------------------------------------|----------------------|
| NMR distance and dihedral constraints               |                      |
| Distance constraints                                |                      |
| Total NOE                                           | 2157                 |
| Intra-residue                                       | 623                  |
| Inter-residue                                       | 1534                 |
| Sequential ( $ i - j  = 1$ )                        | 453                  |
| Medium-range ( $ i - j  < 4$ )                      | 504                  |
| Long-range ( $ i - j  > 5$ )                        | 577                  |
| Inter-molecular                                     | 137                  |
| Hydrogen bonds                                      | 56                   |
| Total dihedral angle restraints                     |                      |
| $\Phi$ angle                                        | 97                   |
| $\Psi$ angle                                        | 97                   |
| Ramachandran Map Analysis (%)                       |                      |
| Most favored regions                                | 98.8                 |
| Additional allowed regions                          | 1.2                  |
| Generously allowed regions                          | 0.0                  |
| Disallowed regions                                  | 0.0                  |
| Structure statistics                                |                      |
| Violations (mean $\pm$ S.D.)                        |                      |
| Distance constraints ( $\text{\AA}$ )               | $0.042 \pm 0.0053$   |
| Dihedral angle constraints ( $^\circ$ )             | $0.18 \pm 0.11$      |
| Max. dihedral angle violation ( $^\circ$ )          | 0.46                 |
| Max. distance constraint violation ( $\text{\AA}$ ) | 0.054                |
| Deviations from idealized geometry                  |                      |
| Bond lengths ( $\text{\AA}$ )                       | $0.0040 \pm 0.00014$ |
| Bond angles ( $^\circ$ )                            | $0.58 \pm 0.017$     |
| Improper ( $^\circ$ )                               | $1.3 \pm 0.043$      |
| Average pairwise r.m.s. deviation ( $\text{\AA}$ )  |                      |
| Heavy                                               | $0.62 \pm 0.061$     |
| Backbone                                            | $0.27 \pm 0.045$     |

- Procheck residue numbers are 348-380, 397-409, 411-436, and 437-456.
- The residue number range used in full molecule root-mean-square (r.m.s.) deviation calculations consists of 352-455.
- Pairwise r.m.s. deviation was calculated among top 20/200 lowest energy structures.
